# Supplementary material for: In situ sulfurized CoMoS/CoMoO4 shell–core nanorods supported on N-doped reduced graphene oxide (NRGO) as efficient electrocatalyst for hydrogen evolution reaction
Source: Royal Society of Chemistry journal article supplement (doi:10.1039/c6ta10284k), 2017-01-01
Supplement: c6ta10284k1.pdf [file c6ta10284k1.pdf]

## Supporting Information

### **In-situ sulfurized CoMoS/CoMoO<sub>4</sub> shell-core nanorods supported on N-doped reduced graphene oxide (NRGO) as efficient electrocatalyst for hydrogen evolution reaction**

Yan-Ru Liu <sup>a</sup>, Xiao Shang <sup>a</sup>, Wen-Kun Gao <sup>a, b</sup>, Bin Dong<sup>\*a, b</sup>, Xiao Li <sup>a</sup>, Xue-Hui Li <sup>a</sup>,

Jin-Chong Zhao <sup>a</sup>, Yong-Ming Chai <sup>a</sup>, Yun-Qi Liu<sup>\*a</sup>, Chen-Guang Liu <sup>a</sup>

*a State Key Laboratory of Heavy Oil Processing, China University of Petroleum (East China),*

*Qingdao 266580, PR China*

*b College of Science, China University of Petroleum (East China), Qingdao 266580, PR China*

---

\* Corresponding author. Email: [dongbin@upc.edu.cn](mailto:dongbin@upc.edu.cn) (B. Dong), [liuyq@upc.edu.cn](mailto:liuyq@upc.edu.cn) (Y.Q. Liu)

Tel: +86-532-86981376, Fax: +86-532-86981787

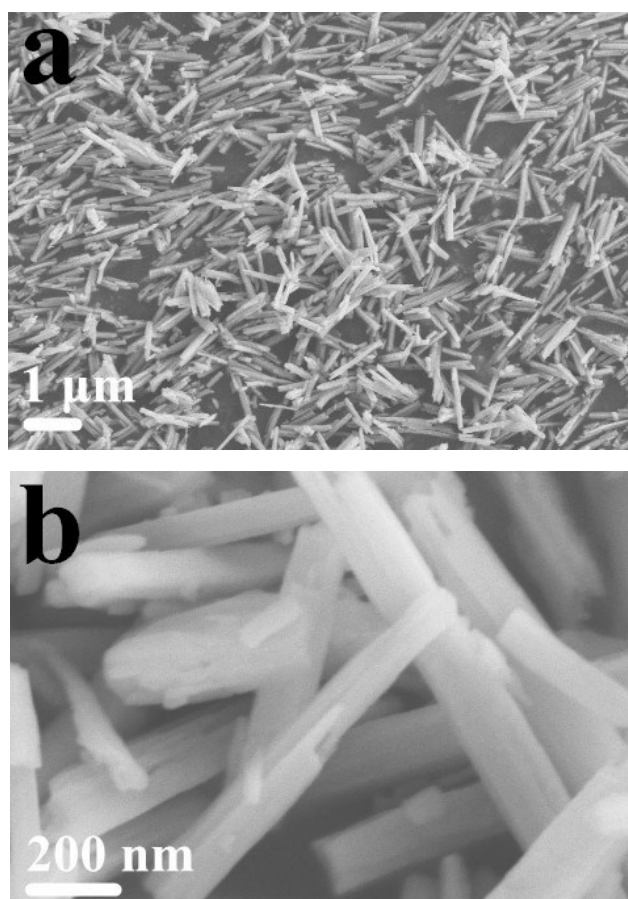

**Figure S1.** SEM images of CoMoO<sub>4</sub> nanorods.

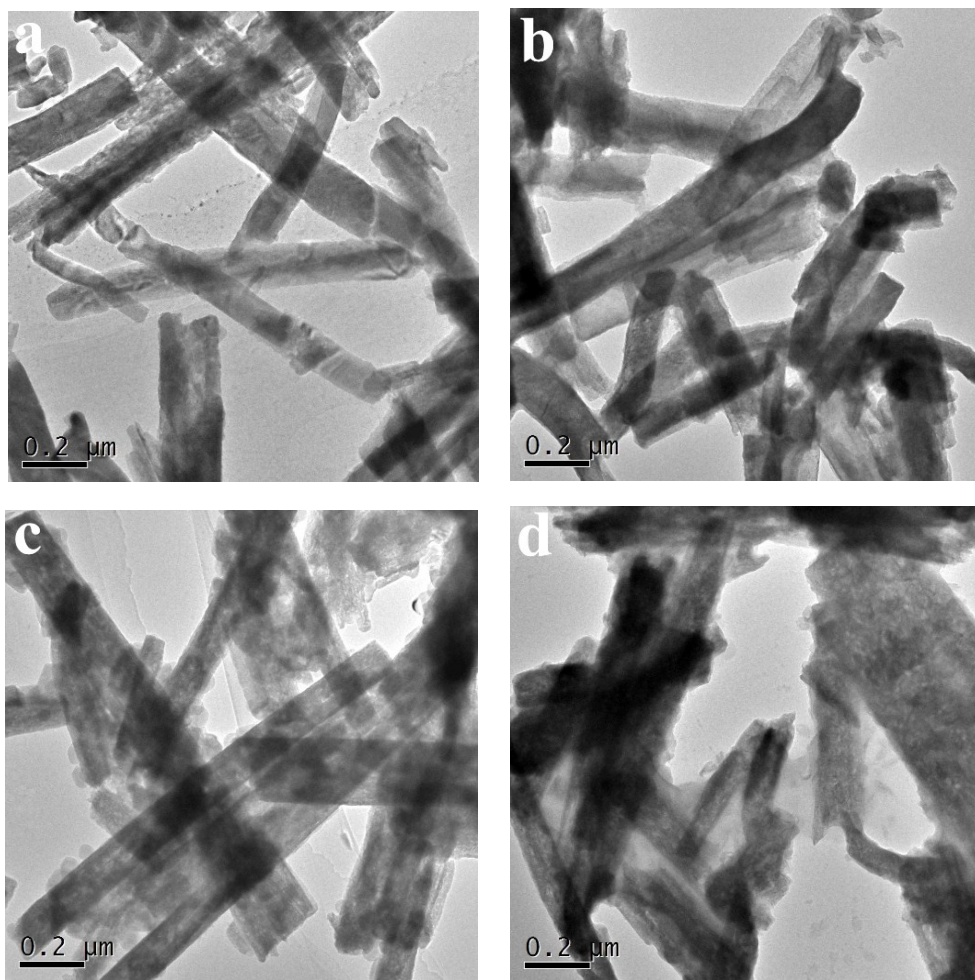

**Figure S2.** TEM images of: (a) CMS-2; (b) CMS-3; (c) CMS-4 and (d) CMS-5.

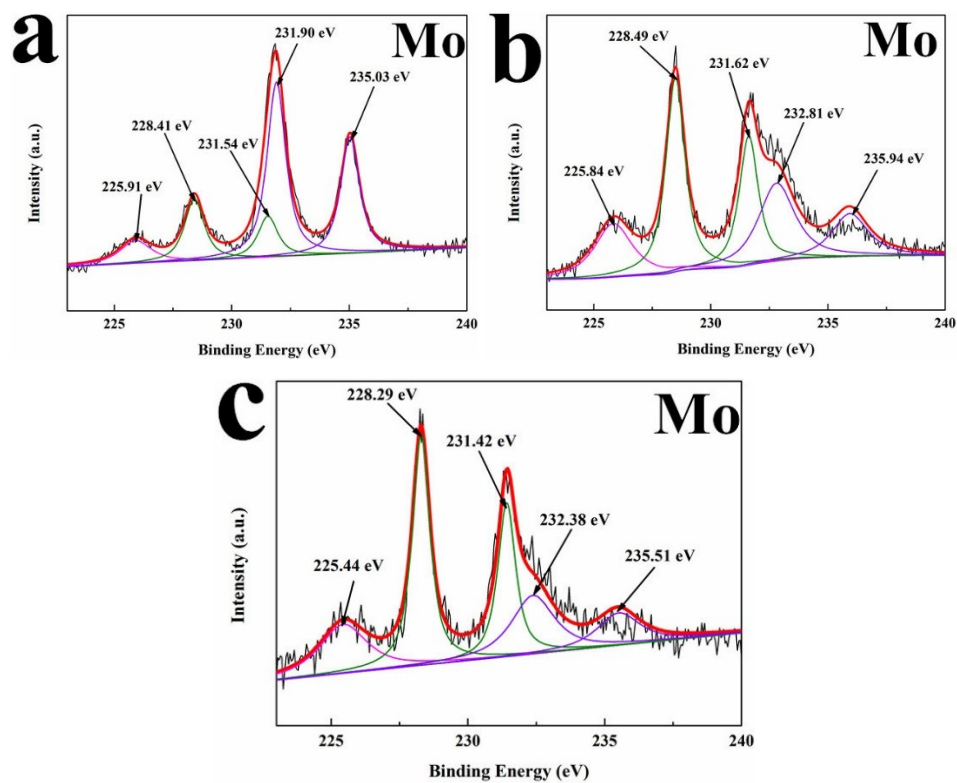

**Figure S3.** XPS high-resolution scans of Mo 3d of: (a) CMS-2; (b) CMS-4 and (c) CMS-5.

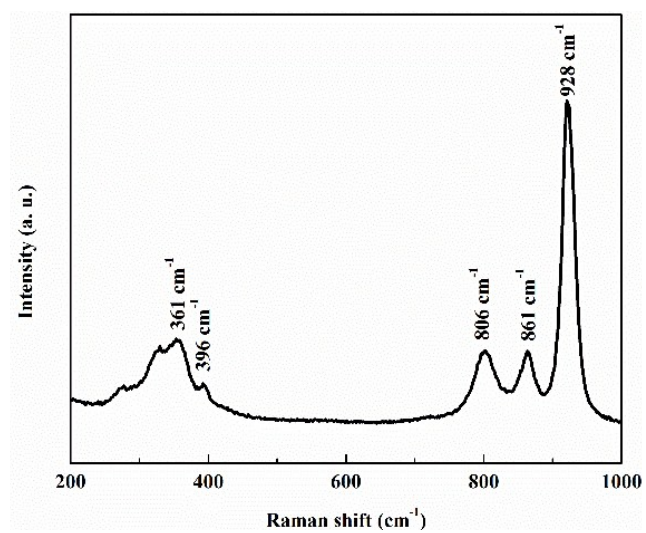

**Figure S4.** Raman spectrum for CMS-3.

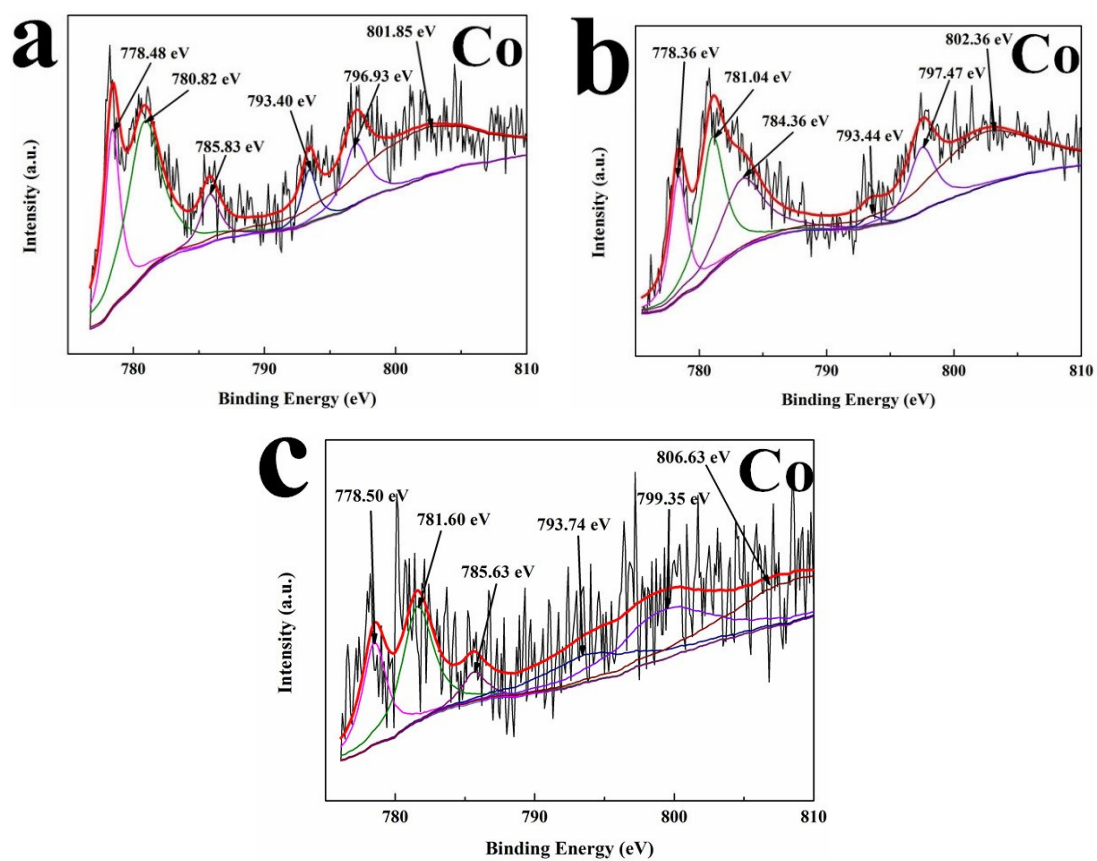

**Figure S5.** XPS high-resolution scans of Co 2p of: (a) CMS-2; (b) CMS-4 and (c) CMS-5.

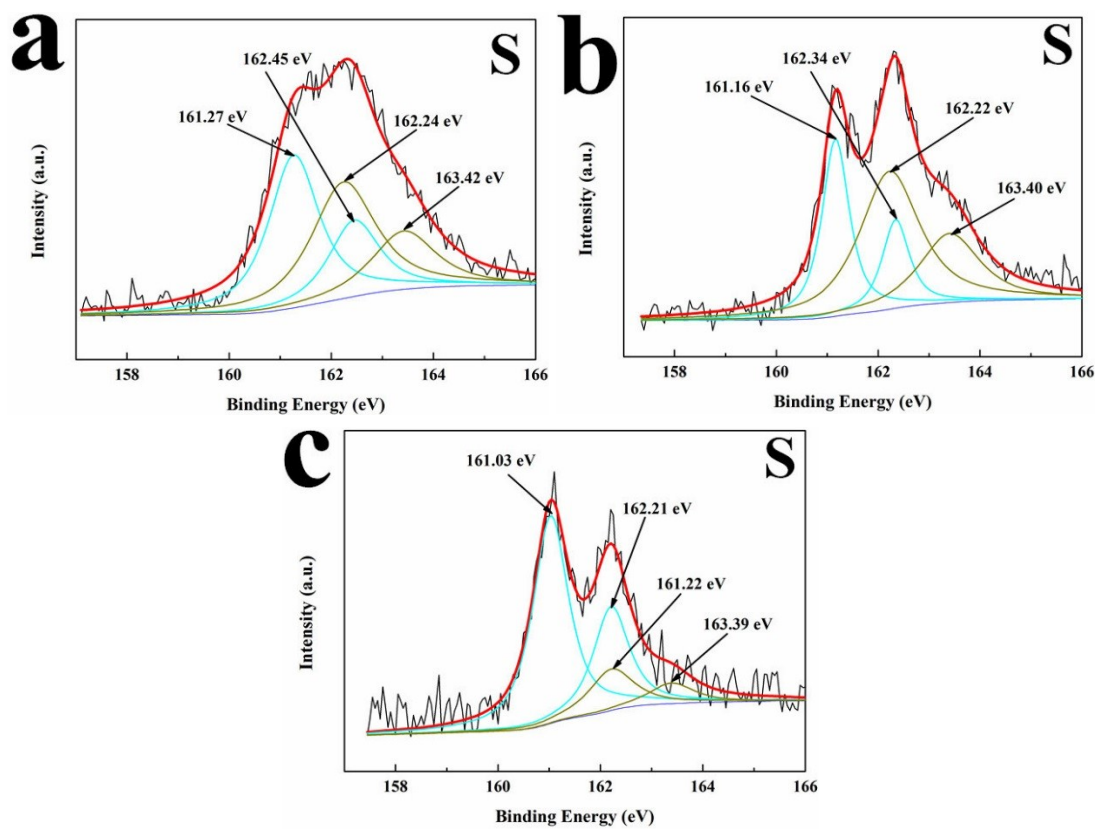

**Figure S6.** XPS high-resolution scans of S 2p of: (a) CMS-2; (b) CMS-4 and (c) CMS-5.

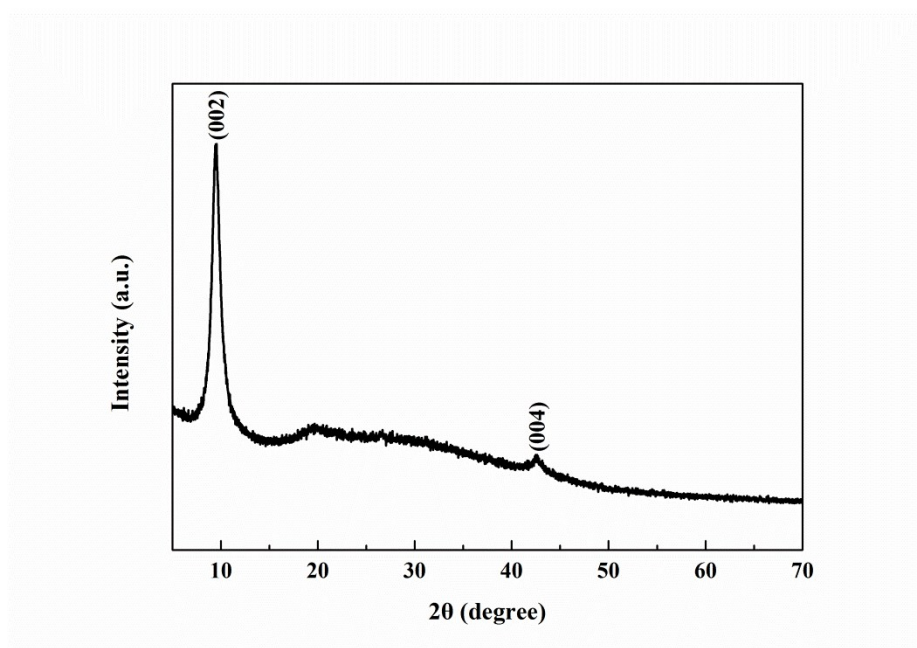

**Figure S7.** XRD patterns of GO.

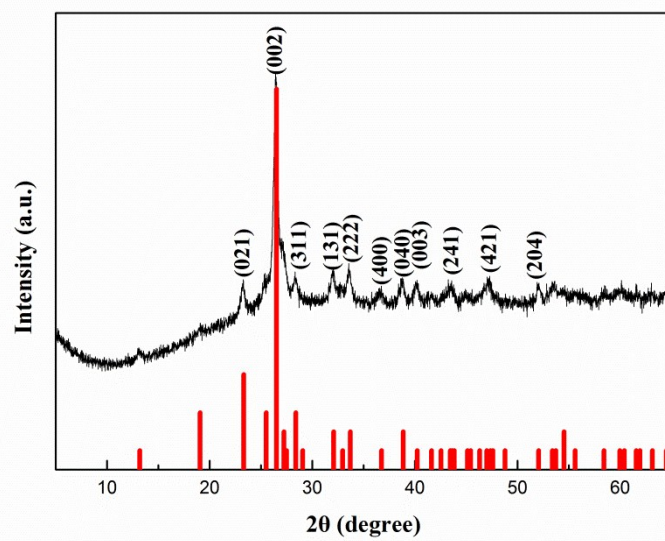

**Figure S8.** XRD patterns of CoMoO<sub>4</sub>/NRGO.

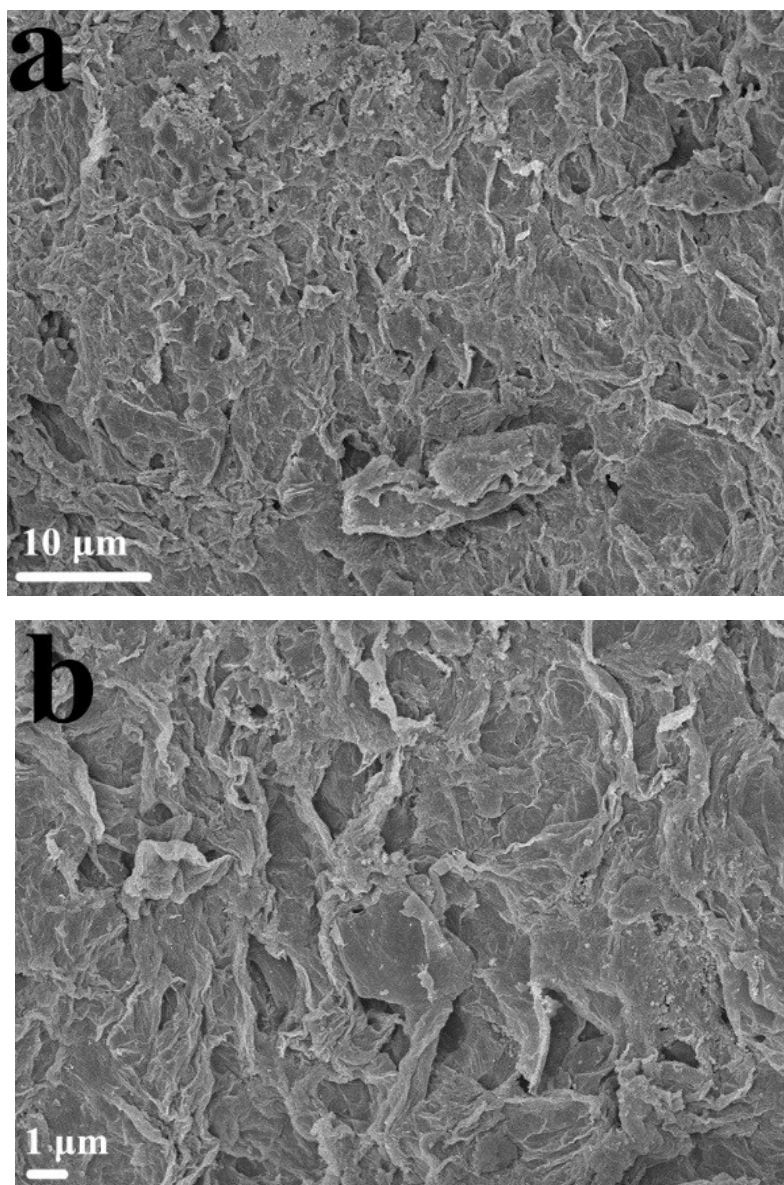

**Figure S9.** SEM images of GO.

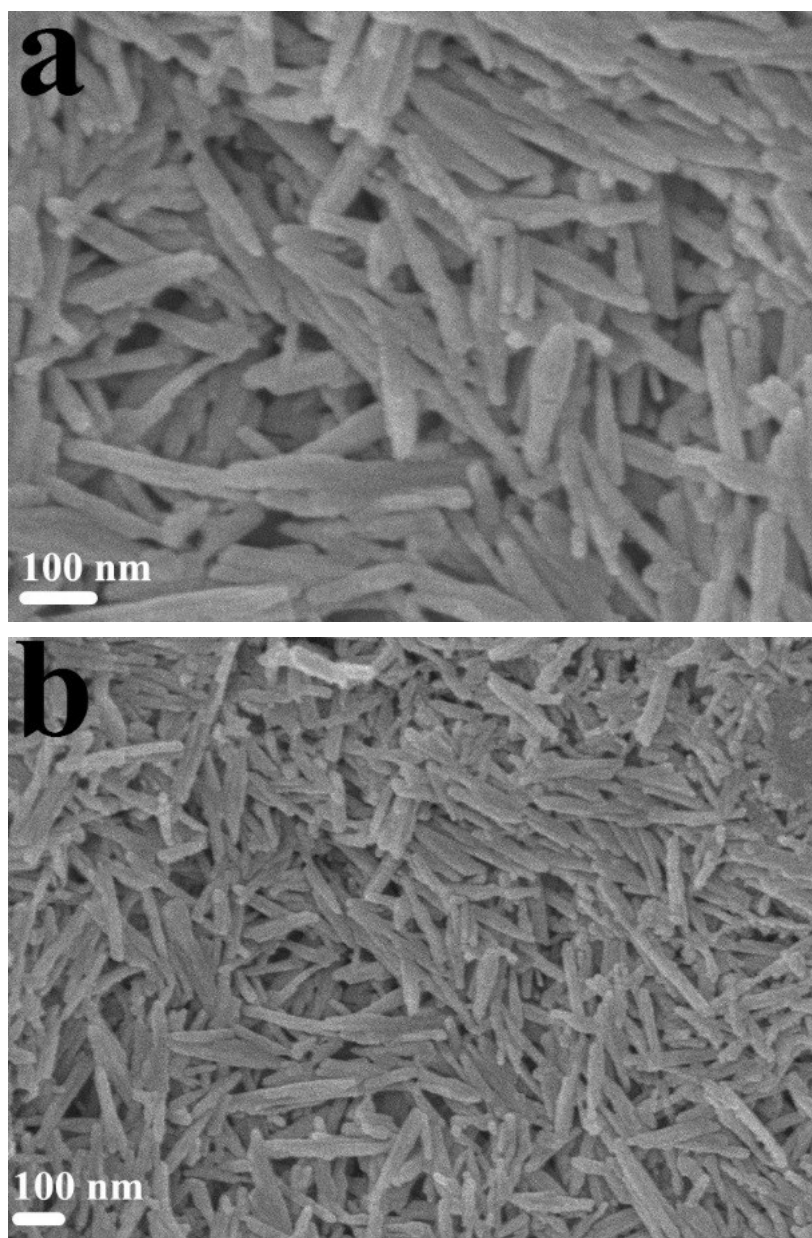

**Figure S10.** SEM images of CMO/NRGO.

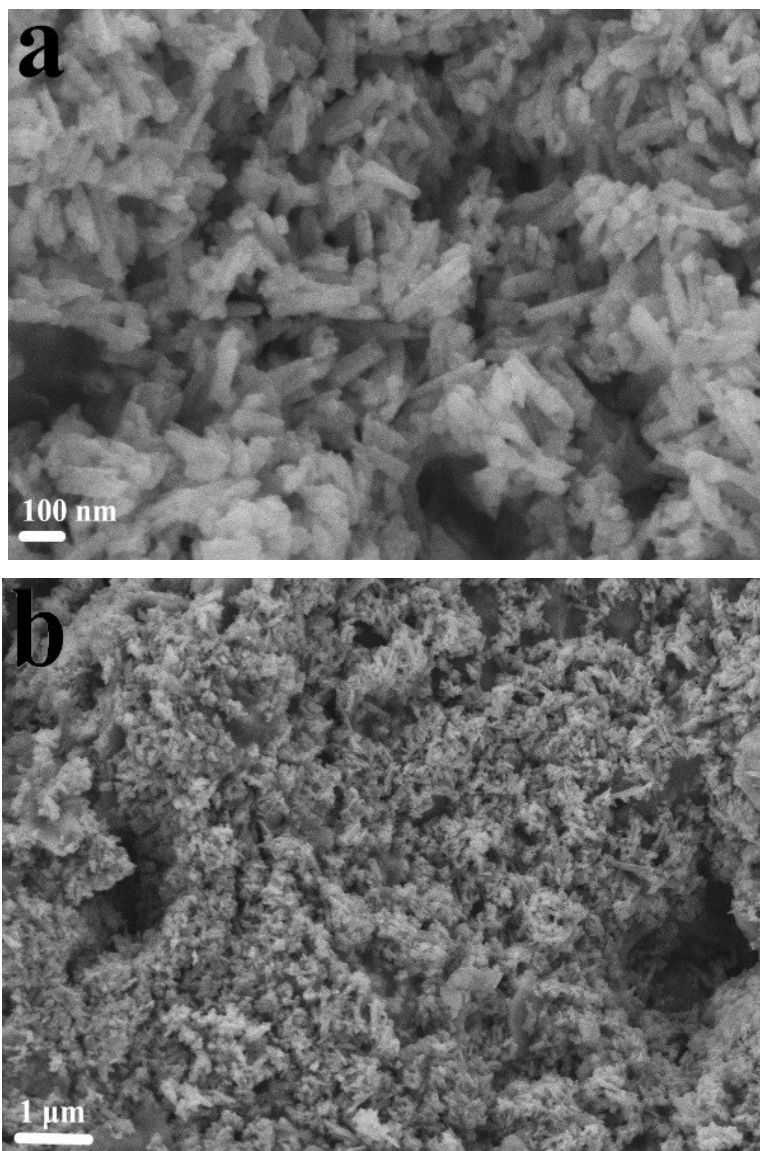

**Figure S11.** (a, b) SEM images of CMS-3/NRGO after long-term test.

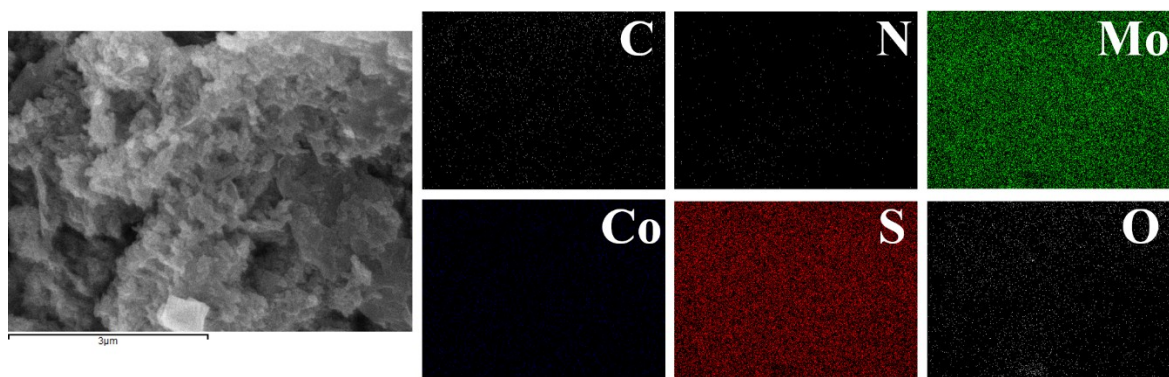

**Figure S12.** SEM mapping of CMS-3/NRGO after long-term test.

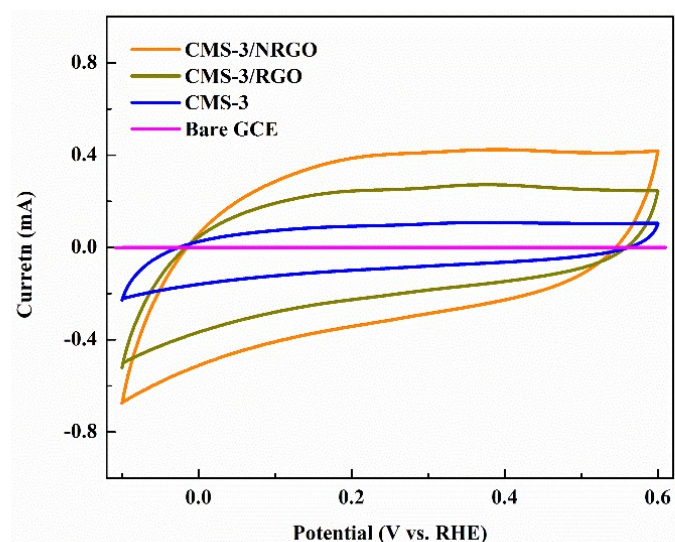

**Figure S13.** CVs of CMS-3/NRGO, CMS-3/RGO, CMS-3 and bare GCE at pH=7 with a scan rate of 50 mV s<sup>-1</sup>.
